# Supplementary material for: A French Translation of the Pleasure Arousal Dominance (PAD) Semantic Differential Scale for the Measure of Affect and Drive
Source: PubMed Central journal article supplement (PMC5808109; doi:10.5334/pb.340), 2017-03-13
Supplement: pb-57-1-340-s1.pdf [file pb-57-1-340-s1.pdf]

| Number | Image        | Valence    |          |          | Arousal    |          |          | Dominance  |          |          |
|--------|--------------|------------|----------|----------|------------|----------|----------|------------|----------|----------|
|        |              | Mean (StD) | Skewness | Kurtosis | Mean (StD) | Skewness | Kurtosis | Mean (StD) | Skewness | Kurtosis |
| 1090   | Snake        | 4.82 ±1.1  | 0.82     | 1.92     | 5.93 ±1.2  | -0.81    | 2.91     | 4.64 ±1.1  | 0.17     | 1.34     |
| 1240   | Spider       | 4.76 ±1.4  | 0.24     | -0.42    | 6.15 ±1.2  | 0.44     | -0.19    | 4.84 ±1.4  | 0.21     | 0.31     |
| 1500   | Dog          | 6.50 ±1.2  | -0.09    | -0.63    | 5.23 ±1.2  | -0.13    | 1.51     | 5.78 ±1.1  | 1.00     | 0.45     |
| 2040   | Baby         | 6.74 ±1.5  | -0.56    | 0.29     | 5.58 ±1.1  | -0.25    | 2.58     | 6.04 ±1.1  | 0.59     | -0.34    |
| 2110   | AngryFace    | 4.55 ±1.0  | 0.30     | 0.86     | 5.46 ±1.1  | -0.24    | 1.23     | 4.83±1.1   | -0.08    | 0.83     |
| 2200   | NeutFace     | 5.03 ±1.2  | 0.51     | 1.11     | 4.86 ±1.2  | -0.40    | 1.56     | 5.16 ±1.0  | -0.06    | 1.84     |
| 2500   | Man          | 6.10 ±1.3  | 0.26     | -0.30    | 4.79 ±1.1  | -0.62    | 2.39     | 5.41 ±0.8  | 0.62     | -1,12    |
| 3010   | Mutilation1  | 3.12 ±1.4  | 0.14     | -0.50    | 6.39 ±1.3  | -0.01    | -1.23    | 4.17 ±1.2  | -0.59    | 0.56     |
| 3150   | Mutilation2  | 3.45 ±1.3  | 0.11     | -0.26    | 6.46 ±1.2  | 0.27     | -0.39    | 4.13 ±1.2  | -0.42    | 0.40     |
| 4180   | EroticFemale | 5.97±1.3   | -0.14    | 0.72     | 5.93 ±1.5  | -0.00    | 0.05     | 5.21 ±1.1  | 0.21     | 0.03     |
| 4520   | EroticMale   | 6.35 ±1.3  | -0.13    | -0.31    | 5.74 ±1.4  | -0.26    | 0.23     | 5.52 ±1.1  | 0.82     | 1.14     |
| 4610   | Romance      | 6.26 ±1.7  | -0.10    | -0.71    | 5.15 ±1.4  | 0.39     | 0.37     | 5.59 ±1.2  | 0.86     | 1.20     |
| 5000   | Flower       | 6.36 ±1.4  | 0.01     | -0.10    | 4.50 ±1.2  | -0.10    | 1.55     | 5.65 ±1.0  | 0.88     | 2.06     |
| 5600   | Mountains    | 6.47 ±1.2  | 0.20     | -0.79    | 5.12 ±1.3  | -0.22    | 0.80     | 5.07 ±1.0  | 0.51     | 1.20     |
| 6230   | AimedGun     | 3.68 ±1.3  | -0.07    | 0.17     | 6.43 ±1.3  | 0.03     | 0.22     | 3.55 ±1.4  | -0.19    | -0.73    |
| 7000   | RollingPin   | 5.59 ±1.4  | 0.62     | 0.31     | 4.89 ±1.4  | -0.09    | 0.67     | 5.61 ±1.2  | 0.39     | 2.80     |
| 7270   | IceCream     | 6.18 ±1.5  | 0.11     | -0.46    | 5.42 ±1.4  | -0.10    | 0.07     | 5.57 ±1.2  | 0.80     | 0.54     |
| 8030   | Skier        | 6.00 ±1.3  | 0.57     | 0.09     | 6.23 ±1.5  | -0,71    | 1.21     | 5.04 ±1.3  | 0.67     | 0.62     |
| 9090   | Exhaust      | 3.58 ±1.4  | 0.26     | 0.38     | 5.37 ±1.4  | -0.23    | 1.22     | 4.73 ±1.2  | 0.26     | 1.87     |
| 9140   | Cow          | 3.06 ±1.3  | 0.35     | 0.30     | 5.75 ±1.2  | 0.43     | 0.90     | 4.46 ±1.0  | -0.75    | 0.70     |
| 9160   | Soldier      | 3.44 ±1.3  | 0.04     | -2.24    | 5.79 ±1.0  | 0.38     | -1.12    | 4.33 ±1.2  | -0.48    | 0.74     |

Supplemental table : Mean Valence, resp. Arousal and Dominance, skewness and kurtosis for the 21 images of the IAPS.
